# Supplementary material for: The response of the North Pacific Decadal Variability to strong tropical volcanic eruptions
Source: Springer Nature journal article supplement (doi:10.1007/s00382-012-1373-5), 2012-04-28
Supplement: MOESM1 [file 382_2012_1373_MOESM1_ESM.doc]

**Supplementary Figures**

The response of the North Pacific Decadal Variability to Strong Tropical Volcanic Eruptions

Tao Wang*, Odd Helge Otterå, Yongqi Gao, Huijun Wang

*To whom correspondence should be addressed; E-mail: [wangtao@mail.iap.ac.cn](mailto:wangtao@mail.iap.ac.cn)

**List of Figures**

**Figure S1** The AO index in NCEP (black line) and ALL150 simulation (blue line), the dash lines are the linear trends of the NCEP AO index for periods of 1948–1999 and 1970–1999.

**Figure S2** Cross sections of the composite zonal mean zonal wind anomalies (160º E – 140º W, unit: m s-1) for post–eruption winter months. The contours represent the composite zonal mean zonal winds for pre–eruption winters states. Areas with confidence level exceeding 95% are denoted with dots.

**Figure S3** The composite anomalies of evaporation (unit: mm d-1) for post–eruption winters during the third phase. Areas with confidence level exceeding 95% (90%) are denoted with (small) dots.

**Figure S4** The composite anomalies of SNH (unit: W m-2) for post–eruption winters during the second phase. Areas with confidence level exceeding 95% (90%) are denoted with (small) dots.


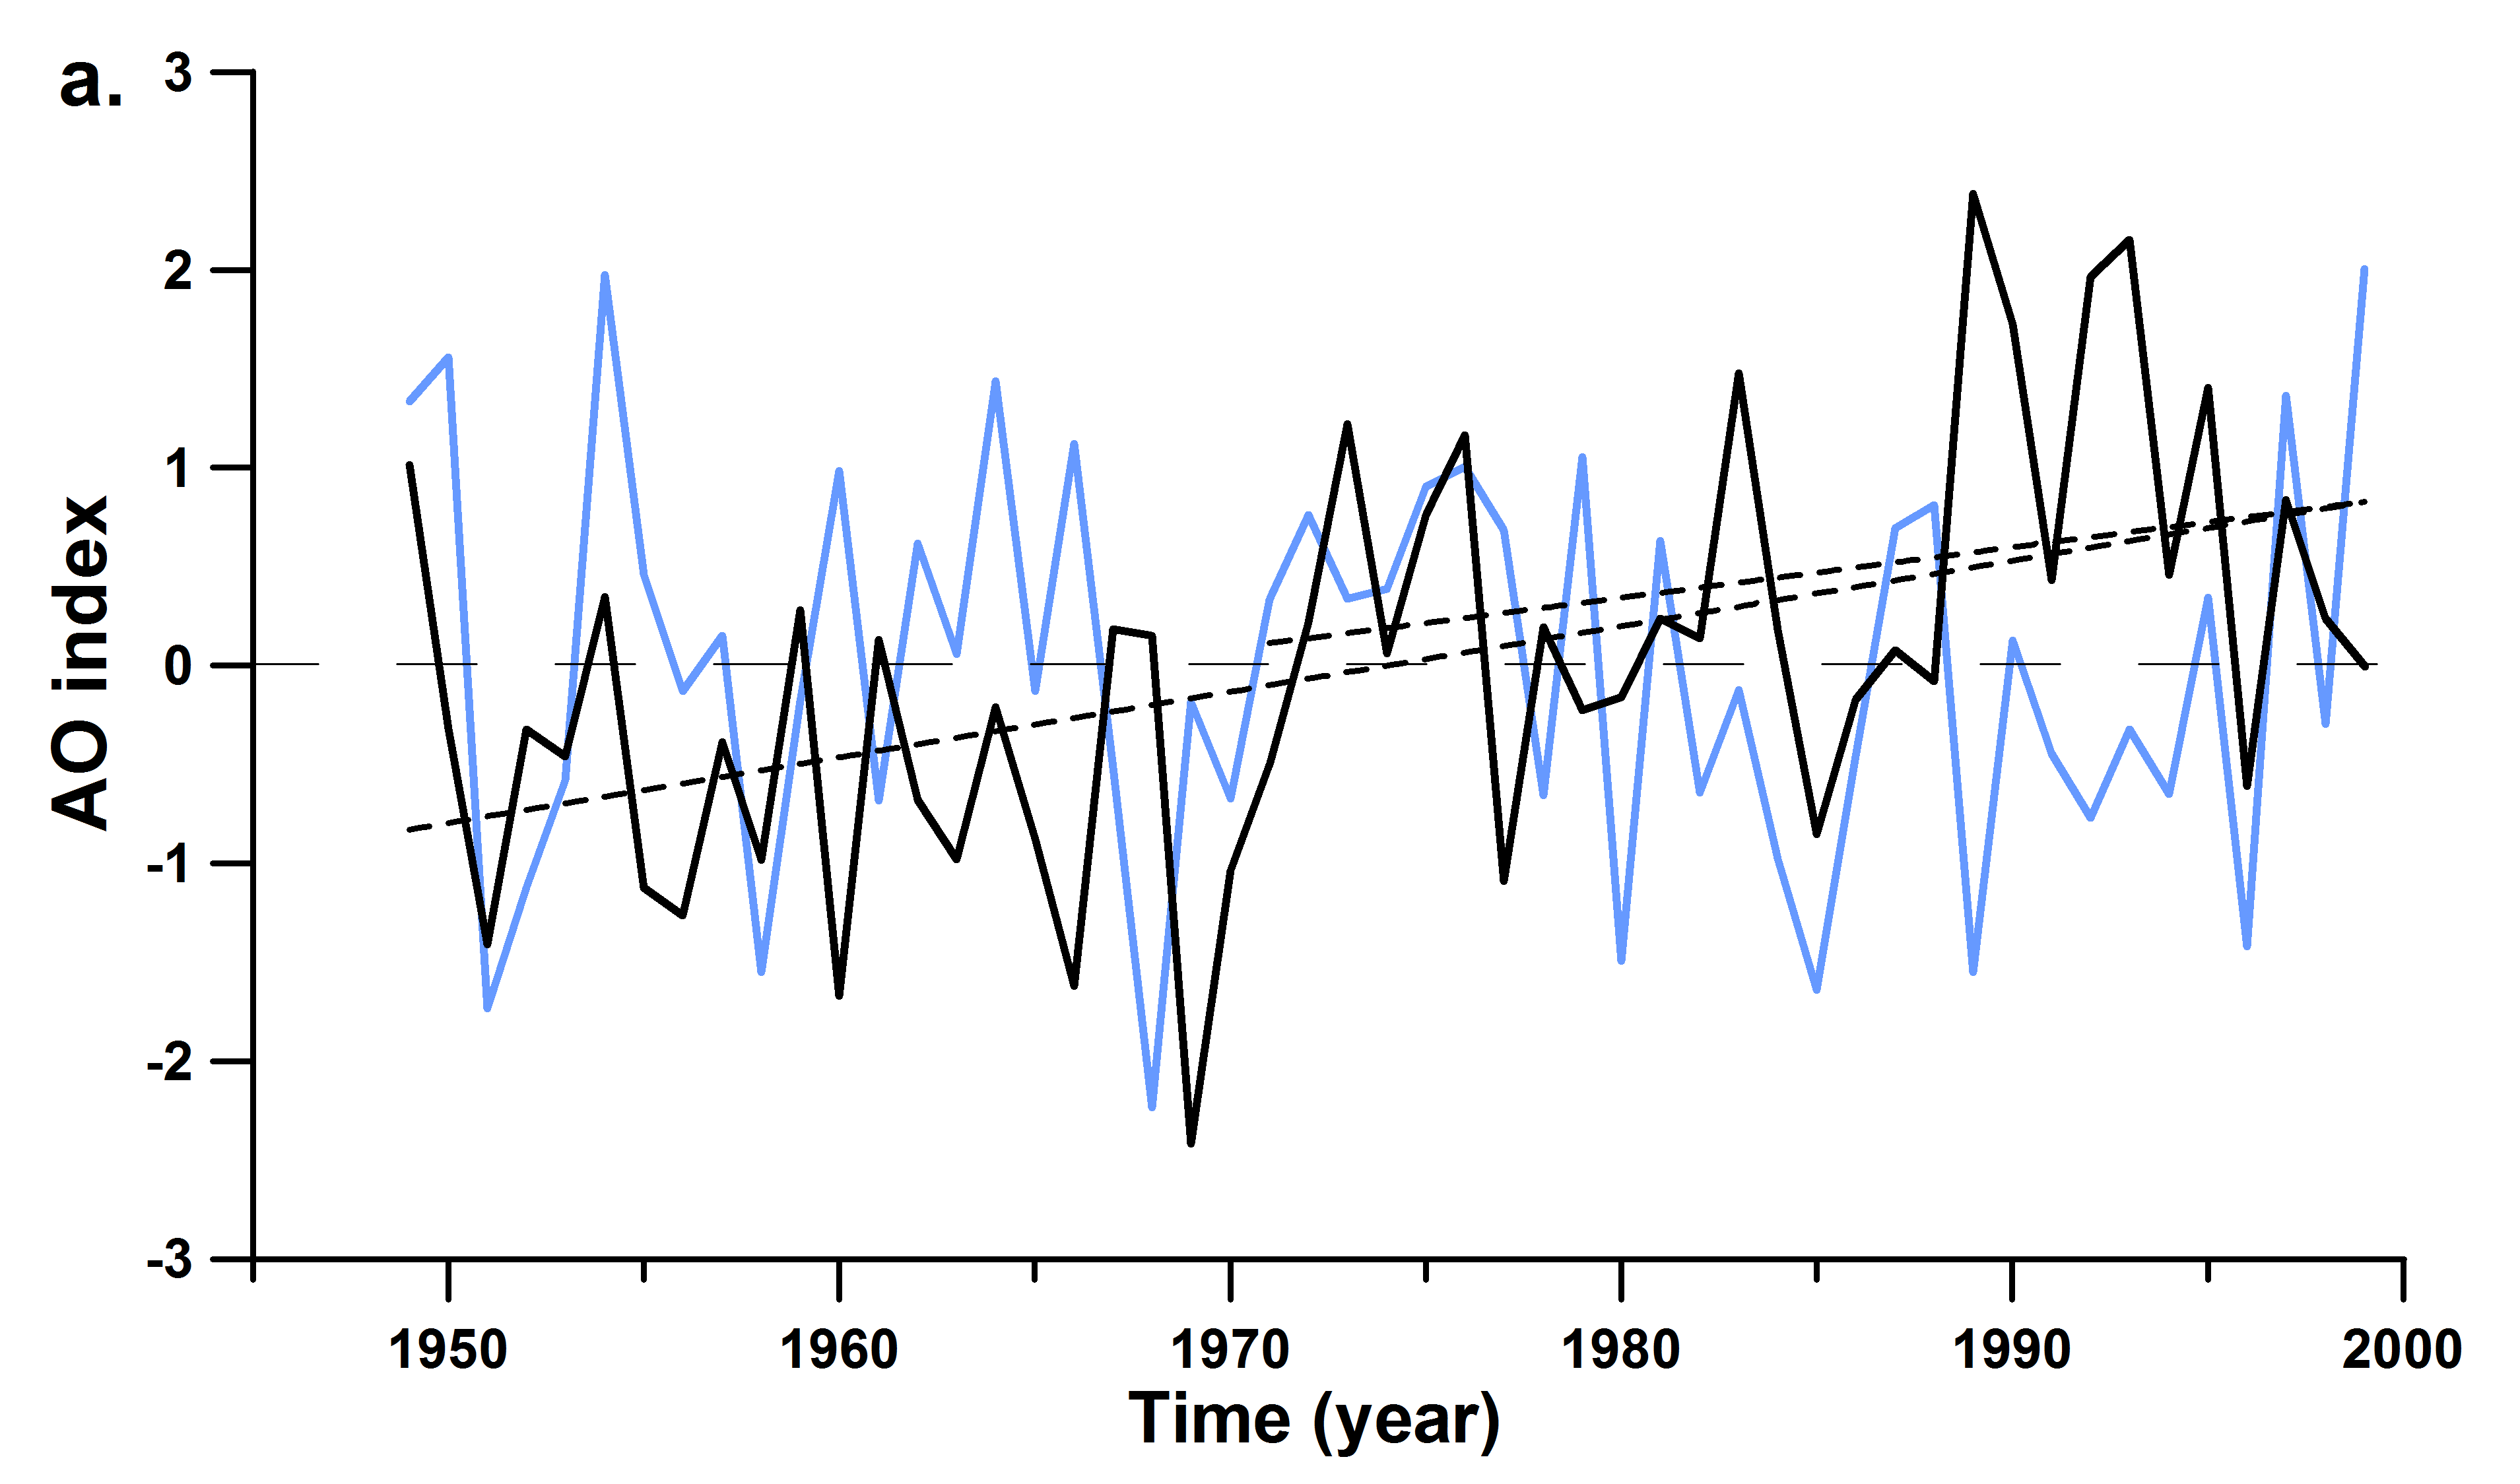


**Figure S1** The AO index in NCEP (black line) and ALL150 simulation (blue line), the dash lines are the linear trends of the NCEP AO index for periods of 1948–1999 and 1970–1999.


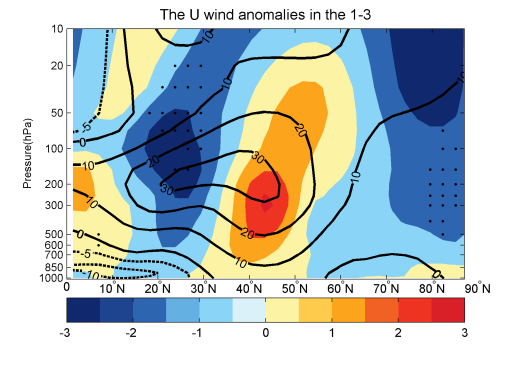

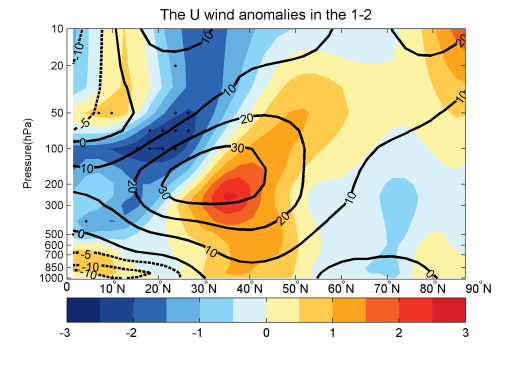

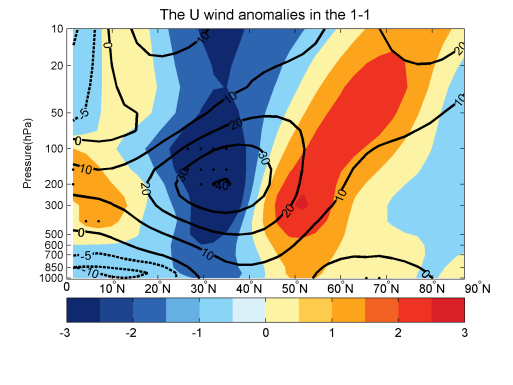

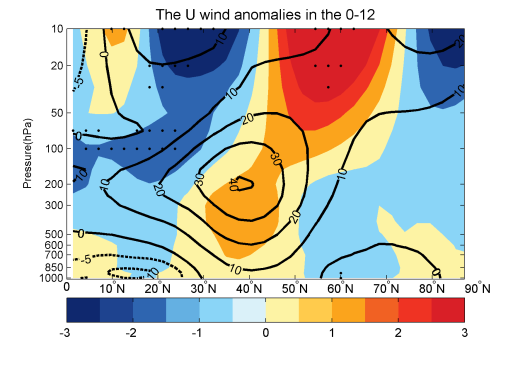

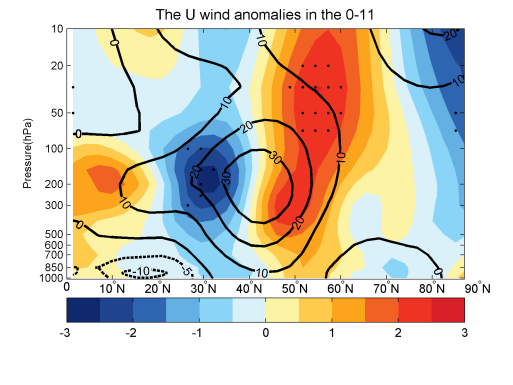

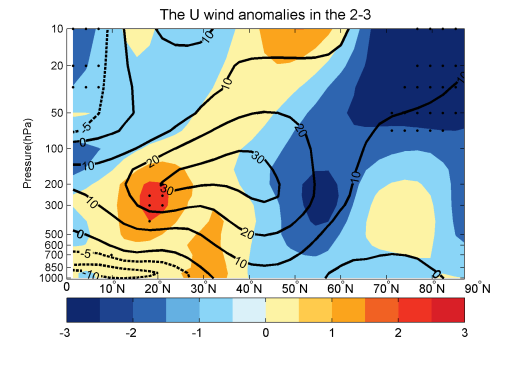

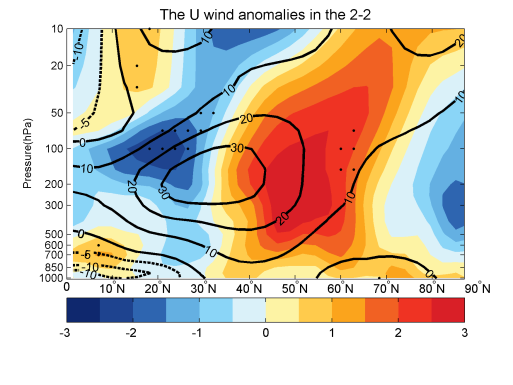

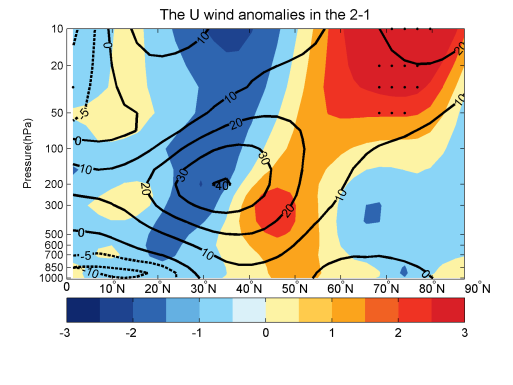

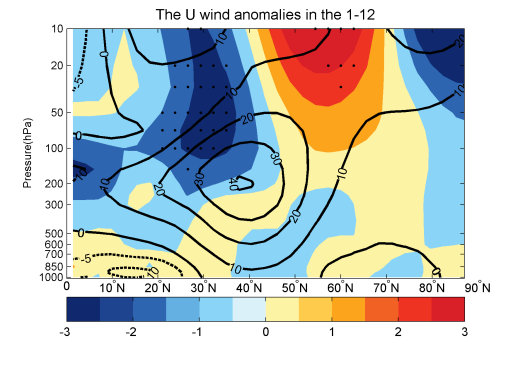

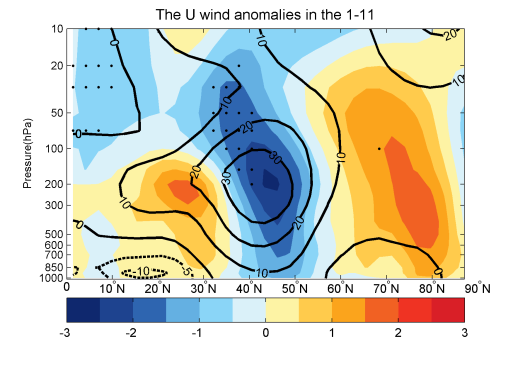

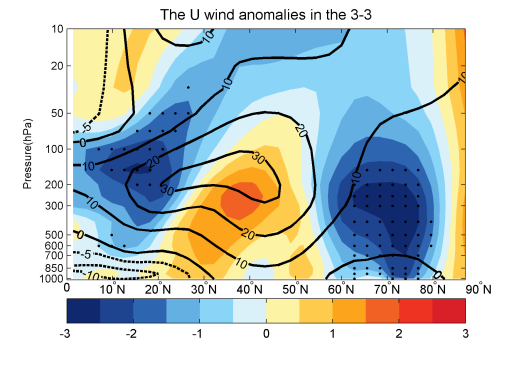

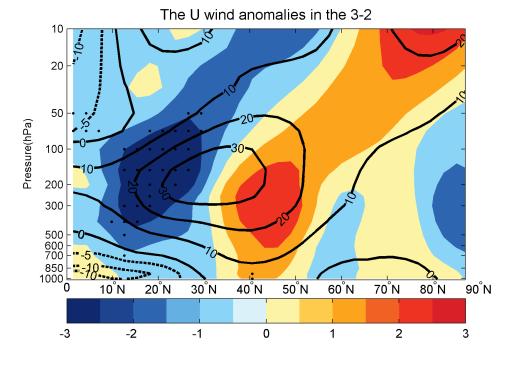

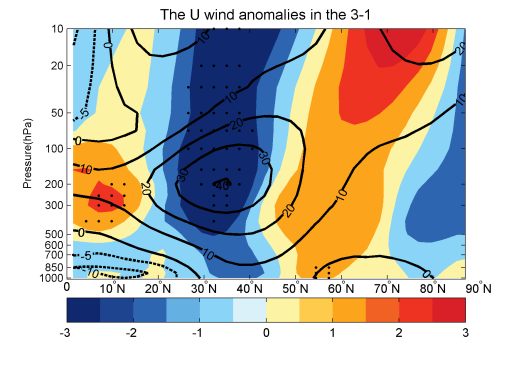

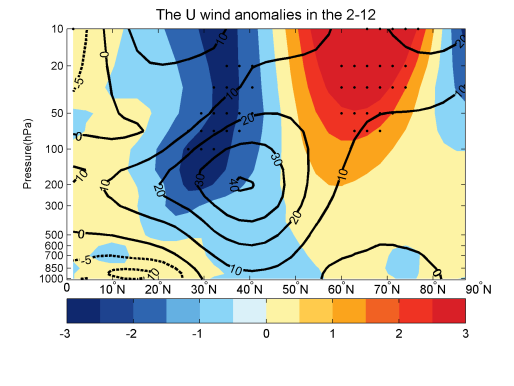

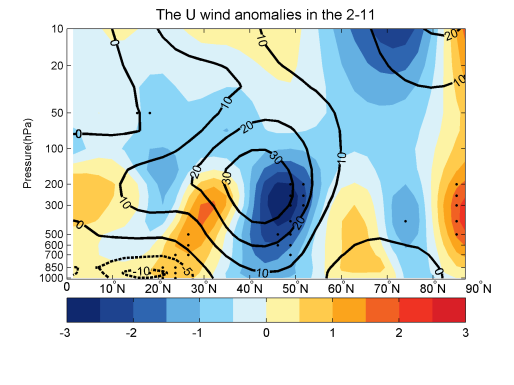

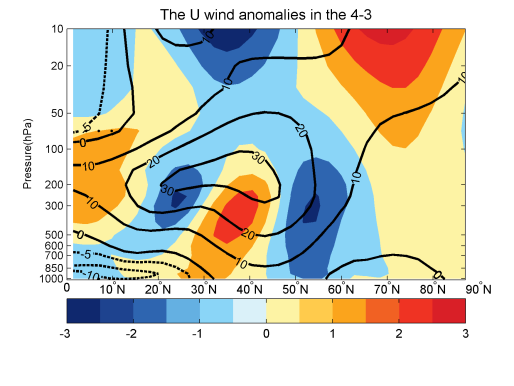

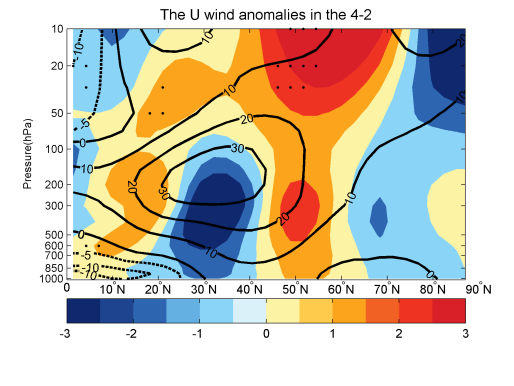

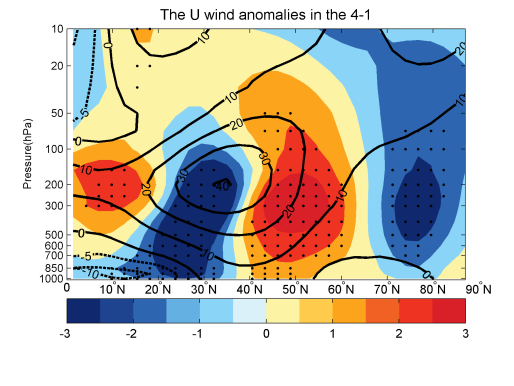

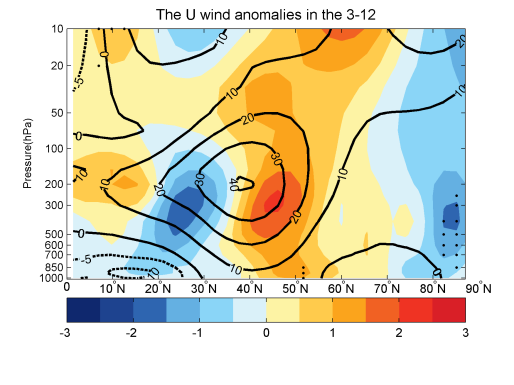

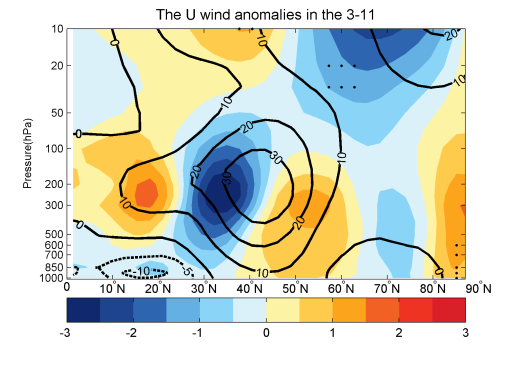


1 post-eruption winter

November

December

January

February

March

2 post-eruption winter

3 post-eruption winter

4 post-eruption winter


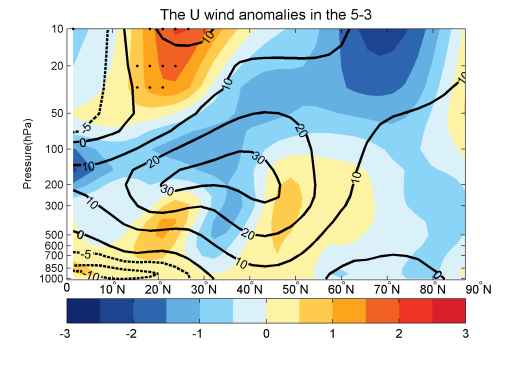

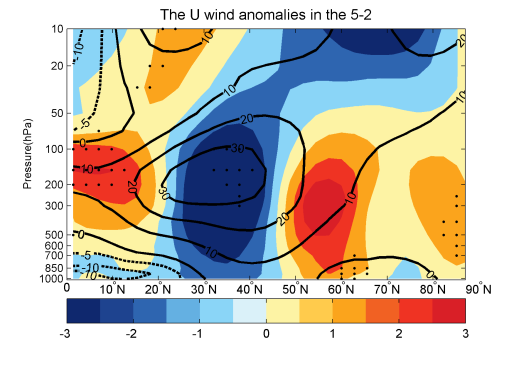

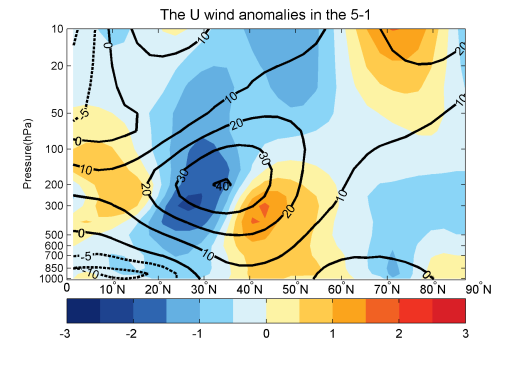

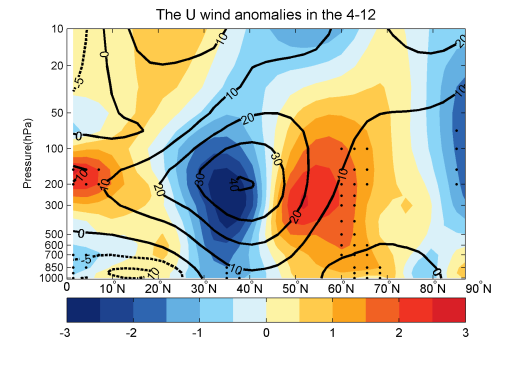

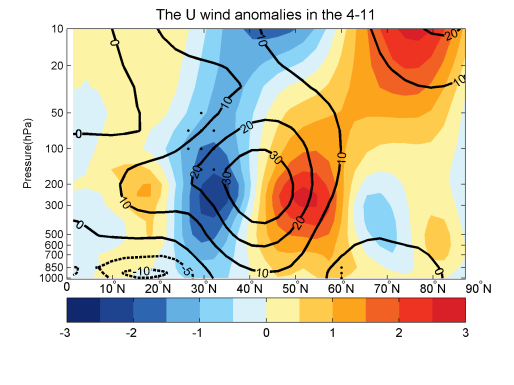

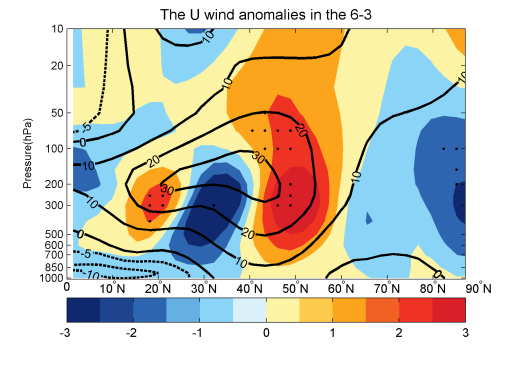

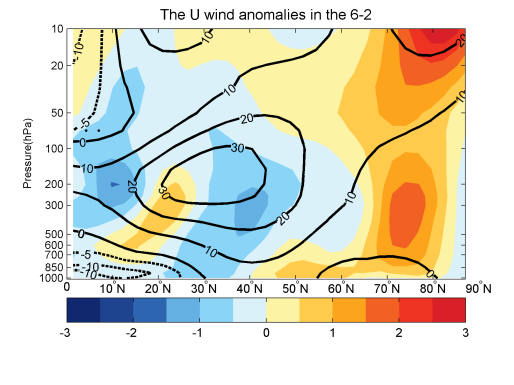

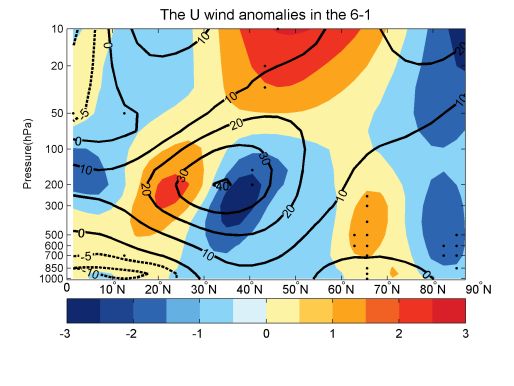

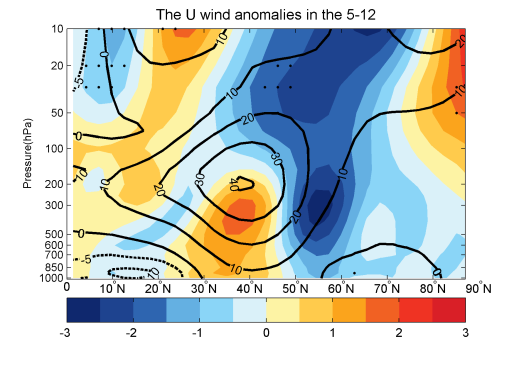

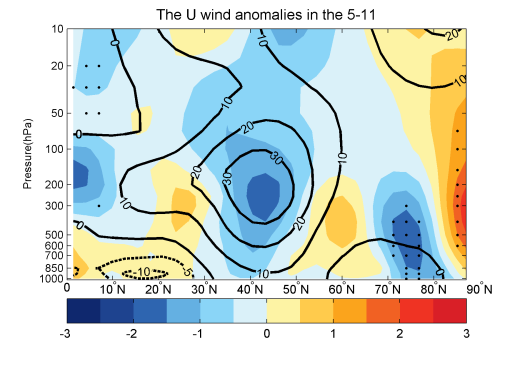

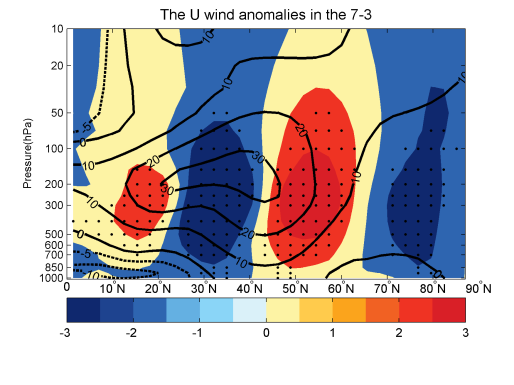

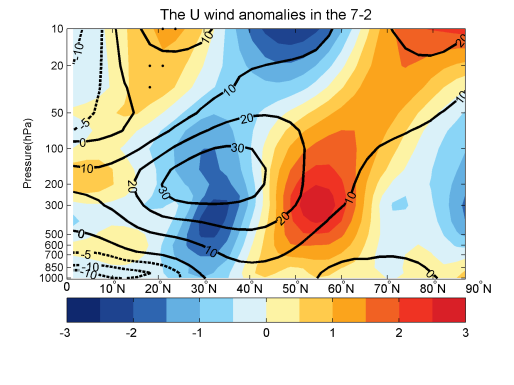

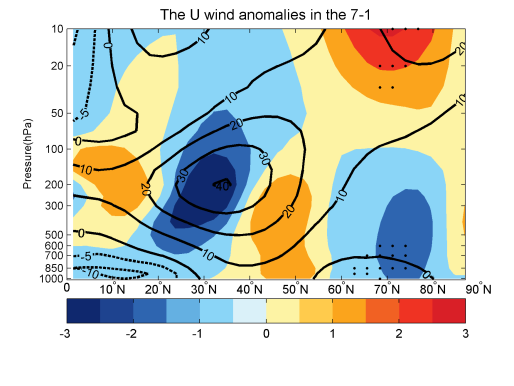

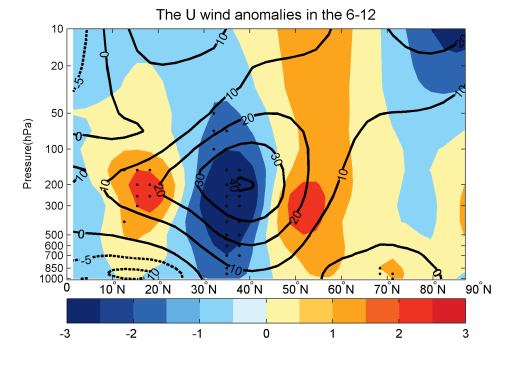

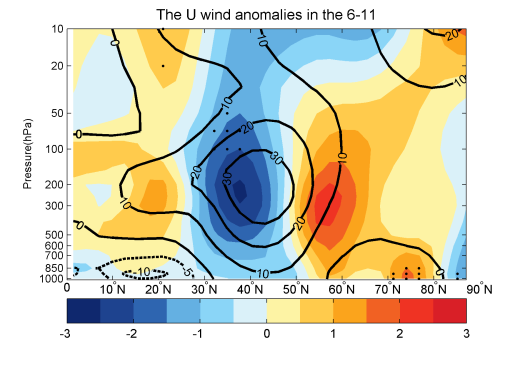


5 post-eruption winter

6 post-eruption winter

7 post-eruption winter

**Figure S2** Cross sections of the composite zonal mean zonal wind anomalies (160º E – 140º W, unit: m s-1) for post–eruption winter months. The contours represent the composite zonal mean zonal winds for pre–eruption winters states. Areas with confidence level exceeding 95% are denoted with dots.


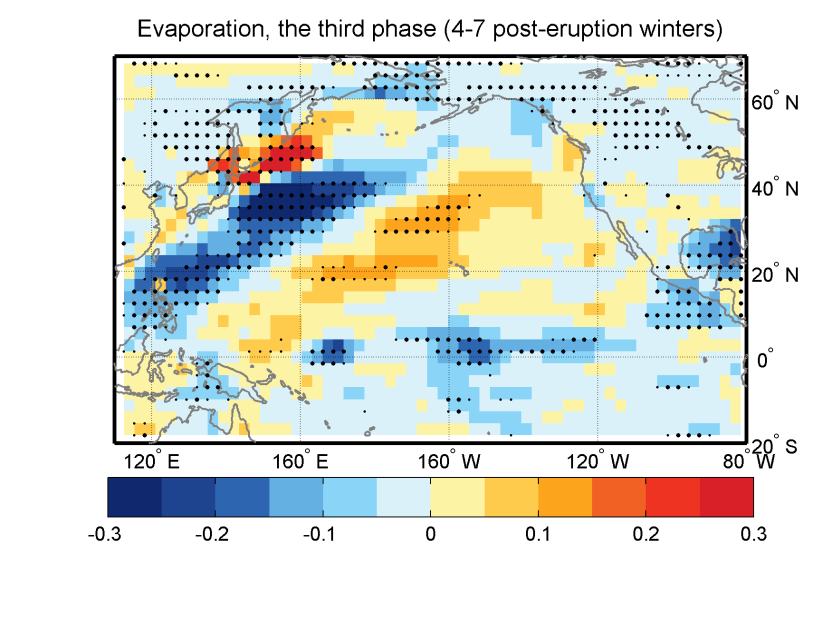


**Figure S3** The composite anomalies of evaporation (unit: mm d-1) for post–eruption winters during the third phase. Areas with confidence level exceeding 95% (90%) are denoted with (small) dots.


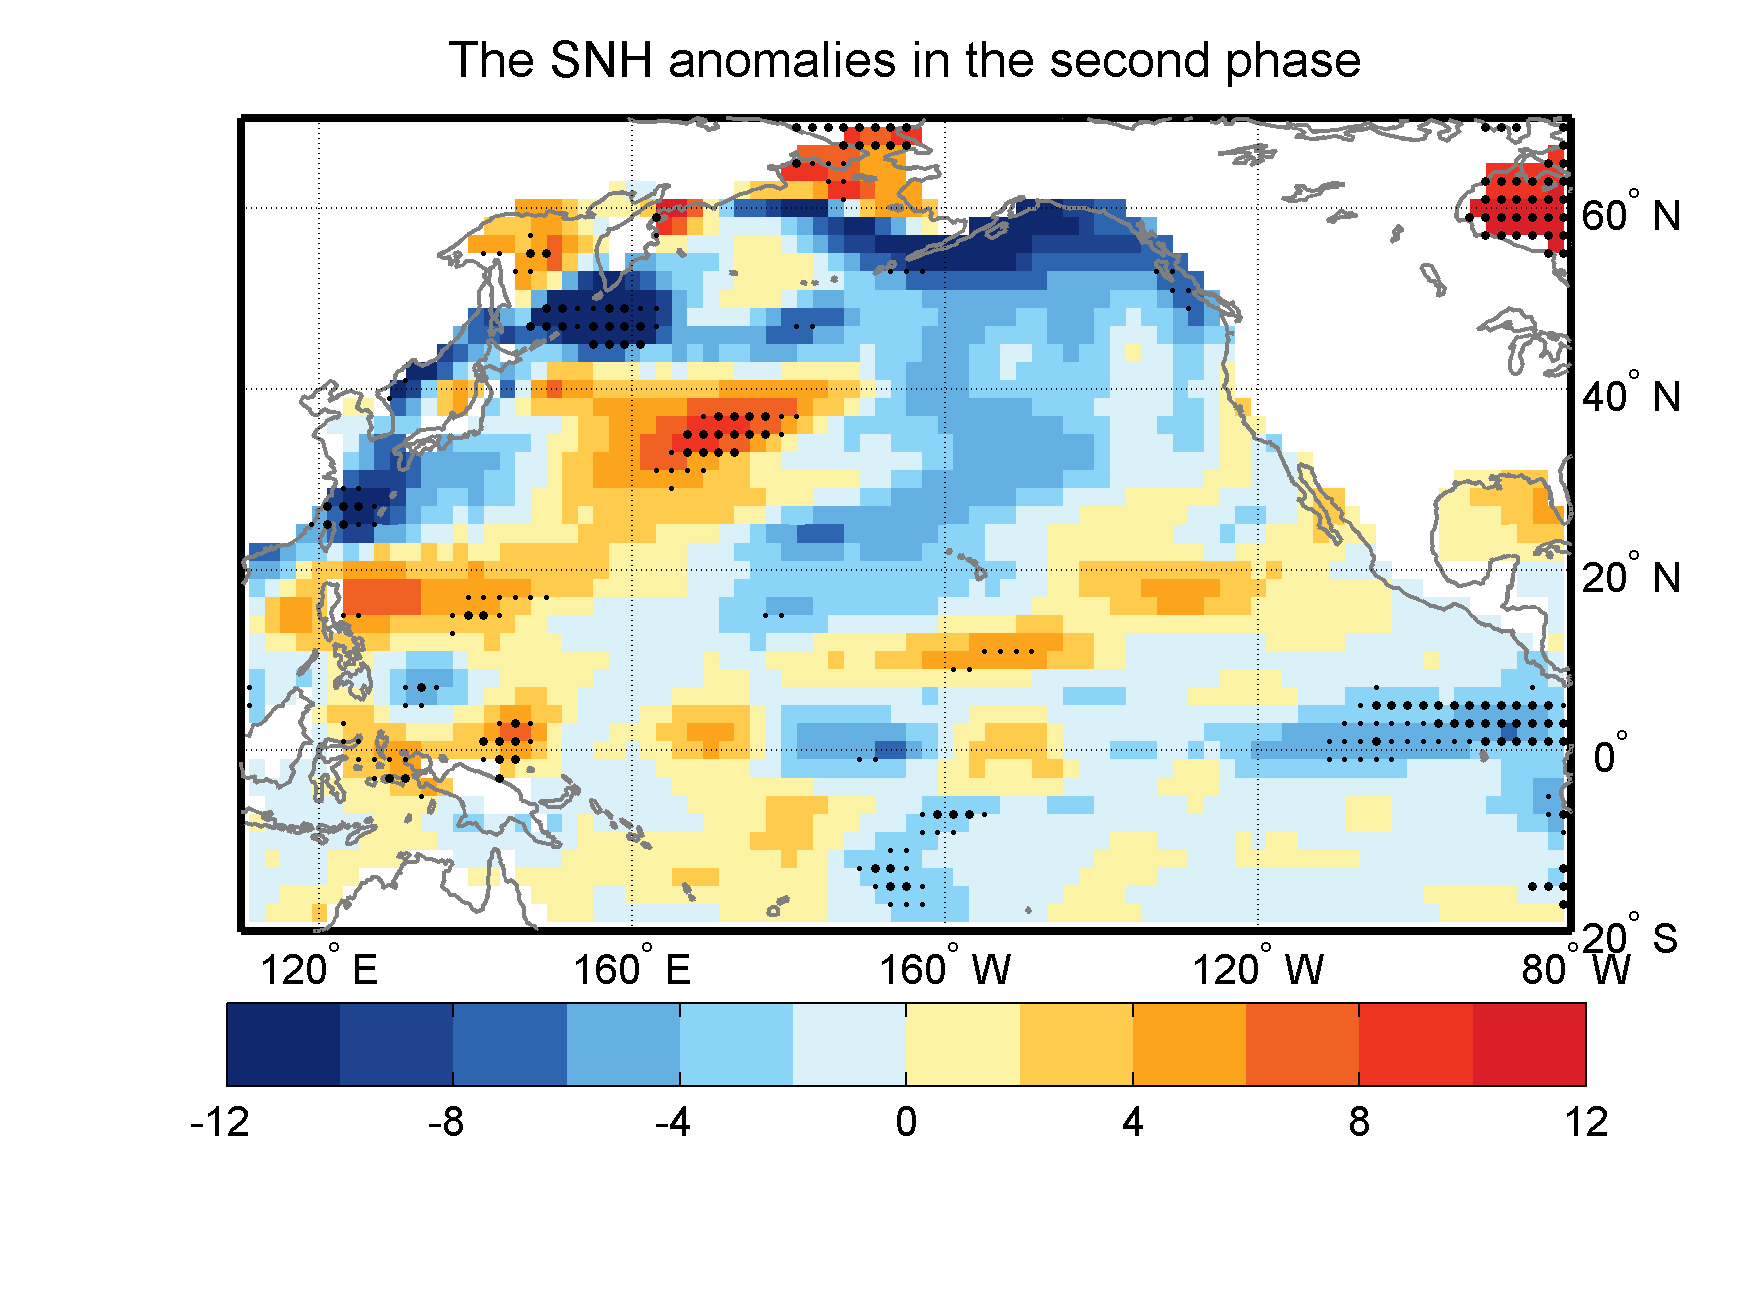


**Figure S4** The composite anomalies of SNH (unit: W m-2) for post–eruption winters during the second phase. Areas with confidence level exceeding 95% (90%) are denoted with (small) dots.
